# Supplementary material for: Tissue-resident Eomes+ NK cells are the major innate lymphoid cell population in human infant intestine
Source: PubMed Central journal article supplement (PMC6395753; doi:10.1038/s41467-018-08267-7), 2019-02-28
Supplement: 41467_2018_8267_MOESM1_ESM.pdf [file 41467_2018_8267_MOESM1_ESM.pdf]

**Tissue-resident Eomes<sup>+</sup> NK cells are the major innate lymphoid cell population in human infant intestine**

Sagebiel et al.

## Supplementary Figures

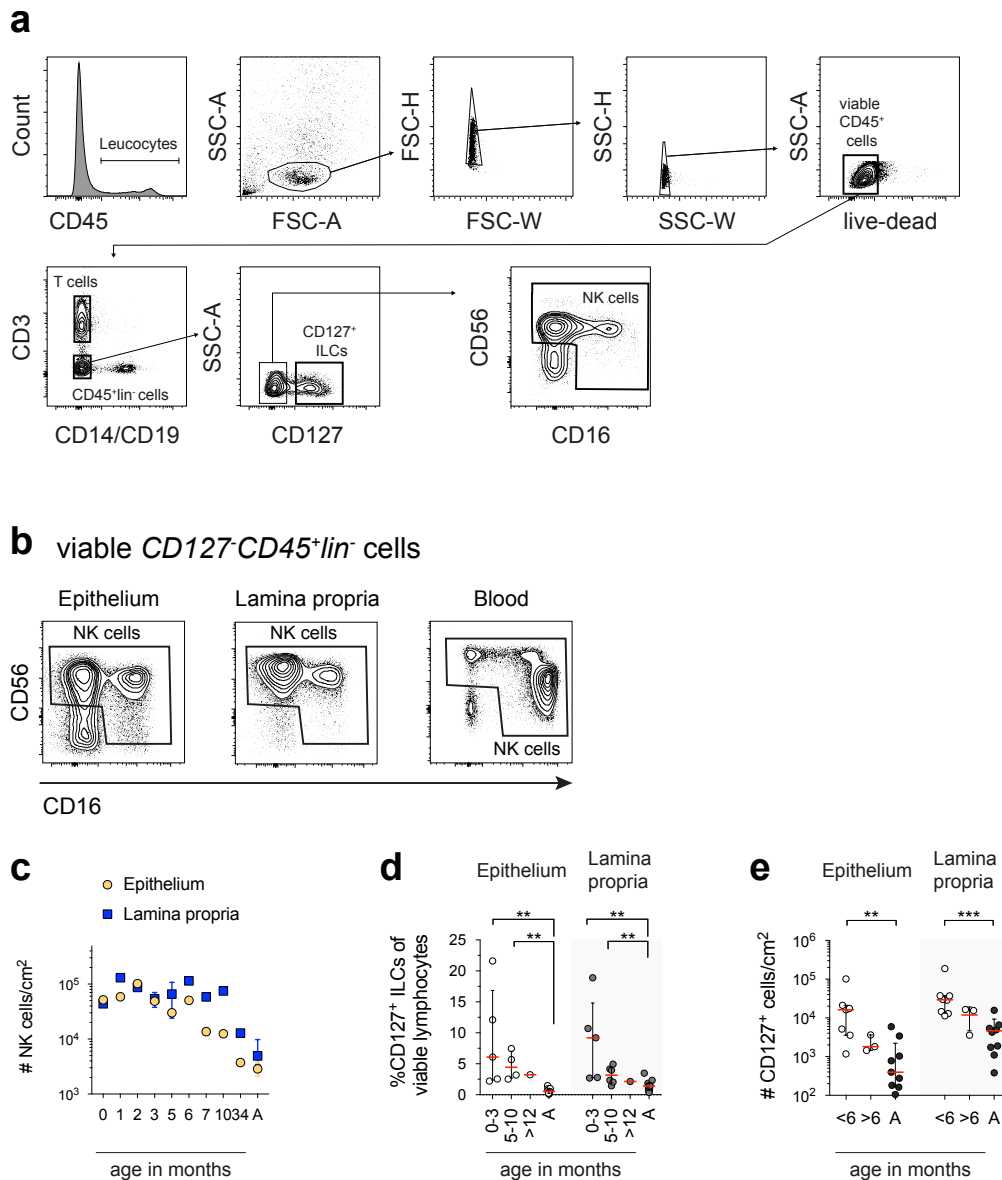

### Supplementary figure 1 | ILC populations in intestines and blood

(a) Gating strategies for viable  $CD45^+$  cells (Fig. 1a, 2a),  $CD45^+lin^-$  cells (Fig. 1b, 2b, 7c), T cells (Fig. 8),  $CD127^+$  ILCs (Fig. 7b, Supplementary Fig. 1d-e, 6) and NK cells (Fig. 2c-e, 3, 4, 5, 6, 7a, 7b, 8, Supplementary Fig. 1b-c, 2, 3, 4, 5). Fluorochromes may differ based on specific panel. (b) Representative flow diagrams of  $CD56$  and  $CD16$  expression by viable  $CD127^+CD45^+lin^-$  cells in intestinal epithelium (EP), lamina propria (LP) and peripheral blood (B) of infants. (c) Absolute NK cell numbers/cm<sup>2</sup> at different ages in EP (yellow circles) and LP (blue squares) in infants and adults (infant samples N=9 (EP) and N=11 (LP), adult samples N=8 (EP) and N=9 (LP)). (d) Frequencies of  $CD127^+$  ILCs of viable  $CD45^+$  lymphocytes for different age groups in EP and LP samples (infant samples N=10 (EP) and N=12 (LP), adult samples N=11 (EP and LP)). (e) Absolute  $CD127^+$  ILC numbers/cm<sup>2</sup> for different age groups in EP and LP samples (infant samples N=10 (EP) and N=11 (LP), adult samples N=9 (EP and LP)). Median frequencies indicated by red lines. Error bars define interquartile ranges between 75th and 25th percentiles. Statistical comparisons are Mann-Whitney U comparisons. Asterisks represent the following  $p$ -values: \*\* $p < 0.01$ , \*\*\* $p < 0.001$ . A = Adult samples. FACS plots of representative donors are shown.

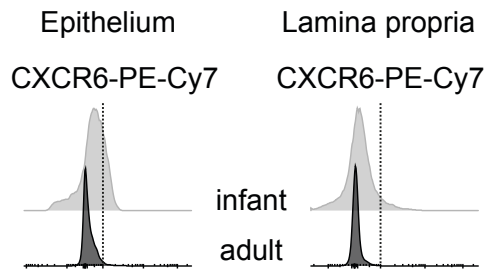

**Supplementary figure 2 | CXCR6 expression by intestinal NK cells**

Representative histogram overlay of CXCR6 expression by infant (gray) and adult (black) NK cells.

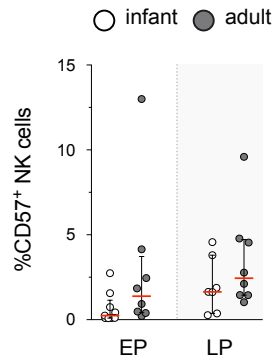

**Supplementary figure 3 | Intestinal CD57<sup>+</sup> NK cells are scarce**

(a) Frequencies of CD57<sup>+</sup> NK cells from epithelium (EP) and lamina propria (LP) of infants (white circles) and adults (dark circles) (infant samples N=9 (EP) and N=7 (LP), adult samples N=8 (EP and LP)). Median frequencies indicated by red lines. Error bars define interquartile ranges between 75th and 25th percentiles. Statistical comparisons are Mann-Whitney U comparisons.

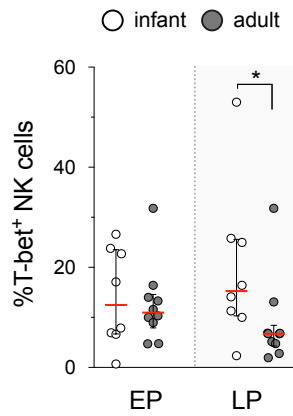

#### Supplementary figure 4 | T-bet expression in infant and adult intestinal NK cells

(a) Frequencies of T-bet<sup>+</sup> NK cells from epithelium (EP) and lamina propria (LP) of infants (white circles) and adults (dark circles) (infant samples N=8 (EP and LP), adult samples N=10 (EP and LP)). Median frequencies indicated by red lines. Error bars define interquartile ranges between 75th and 25th percentiles. Statistical comparisons are Mann-Whitney U comparisons. Asterisks represent the following  $p$ -values: \* $p < 0.05$ .

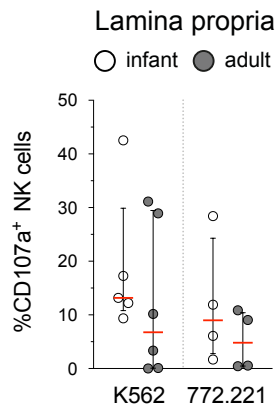

### Supplementary figure 5 | Degranulation of intestinal NK cells upon stimulation

(a) Frequencies of infant (white circles) and adult (dark circles) CD107a<sup>+</sup> NK cells from lamina propria (LP). Cells were stimulated for 6 hours in the presence of K562 or 772.221 target cells (effector/target-ratio: 1:5) (infant samples N=5 (K562) and N=4 (772.221), adult samples N=6 (K562) and N=4 (772.221)). Median frequencies indicated by red lines. Error bars define interquartile ranges between 75th and 25th percentiles. Statistical comparisons are Mann-Whitney U comparisons.

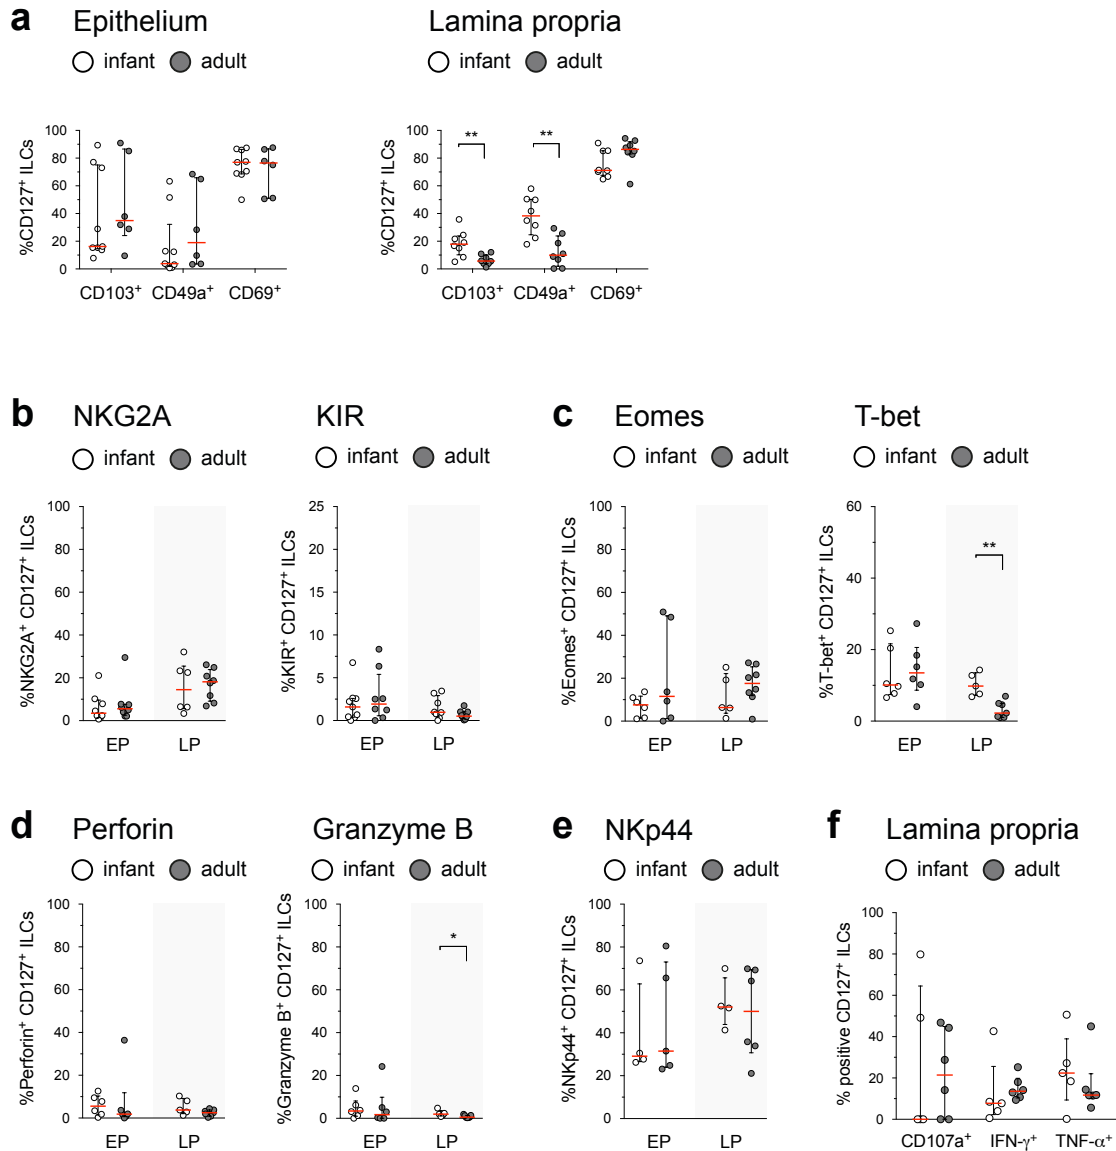

### Supplementary figure 6 | Phenotypic characteristics of intestinal CD127<sup>+</sup> ILCs

(a) Frequencies of infant (white circles) and adult (dark circles) CD103<sup>+</sup>, CD49a<sup>+</sup> or CD69<sup>+</sup> CD127<sup>+</sup> ILCs in epithelium (EP) and lamina propria (LP) tissues (infant samples N=9 (EP) and N=8 (LP), adult samples N=6 (EP) and N=8 (LP)). (b) Frequencies of infant (white circles) and adult (dark circles) NKG2A<sup>+</sup> or KIR<sup>+</sup> CD127<sup>+</sup> ILCs from EP and LP tissues (infant EP samples N=8 (NKG2A) and N=9 (KIR), infant LP samples N=6 (NKG2A) and N=8 (KIR), adult samples N=8 (EP and LP)). (c) Frequencies of infant (white circles) and adult (dark circles) Eomes<sup>+</sup> or T-bet<sup>+</sup> CD127<sup>+</sup> ILCs from EP (infant EP samples N=6 (Eomes and T-bet), infant LP samples N=5 (Eomes and T-bet), adult EP samples N=6 (Eomes and T-bet), adult LP samples N=8 (Eomes) and N=7 (T-bet)). (d) Frequencies of infant (white circles) and adult (dark circles) perforin<sup>+</sup> or granzyme B<sup>+</sup> CD127<sup>+</sup> ILCs from EP and LP tissues (infant samples N=6 (EP) and N=5 (LP), adult samples N=6 (EP) and N=7 (LP)). (e) Frequencies of infant (white circles) and adult (dark circles) NKp44<sup>+</sup> CD127<sup>+</sup> ILCs from EP and LP (infant samples N=4 (EP and LP), adult samples N=5 (EP) and N=6 (LP)). (f) Frequencies of LP CD107a<sup>+</sup>, IFN- $\gamma$ <sup>+</sup> or TNF- $\alpha$ <sup>+</sup> CD127<sup>+</sup> ILCs in infants (white circles) and adults (dark circles). Cells were stimulated for 6 hours in the presence of PMA and ionomycin (infant samples N=5, adult samples N=6). Median frequencies indicated by red lines. Error bars define interquartile ranges between 75th and 25th percentiles. Statistical comparisons are Mann-Whitney U comparisons. Asterisks represent the following *p*-values: \**p* < 0.05, \*\**p* < 0.01.
